# Supplementary material for: Riboflavin-based carbon dots with high singlet oxygen generation for photodynamic therapy
Source: Royal Society of Chemistry journal article supplement (doi:10.1039/d1tb01291f), 2021-01-01
Supplement: d1tb01291f1.pdf [file d1tb01291f1.pdf]

**Supporting Information**

**Riboflavin-Based Carbon Dots with High Singlet Oxygen Generation  
for Photodynamic Therapy†**

Juan Yue,<sup>abc</sup> Li Li,<sup>\*c</sup> Chenyu Jiang,<sup>cd</sup> Qian Mei,<sup>c</sup> Wen-Fei Dong,<sup>\*cd</sup> and Ruhong Yan<sup>\*bc</sup>

a. School of Biomedical Engineering (Suzhou), Division of Life Sciences and Medicine, University of Science and Technology of China, Hefei 230026, P. R. China.

b. The Affiliated Suzhou Science & Technology Town Hospital of Nanjing Medical University, Suzhou 215153, P. R. China. E-mail: yrhzl@hotmail.com.

c. CAS Key Laboratory of Biomedical Diagnostics, Suzhou Institute of Biomedical Engineering and Technology, Chinese Academy of Science (CAS), 88 Keling Road, Suzhou 215163, P. R. China. E-mail: lil@sibet.ac.cn.

d. Jinan Guokekeyigong Science and Technology Development Co., Ltd, Jinan 250103, P. R. China. E-mail: wenfeidong@sibet.ac.cn.

## 1. Solubility comparison between VB2 and CDs

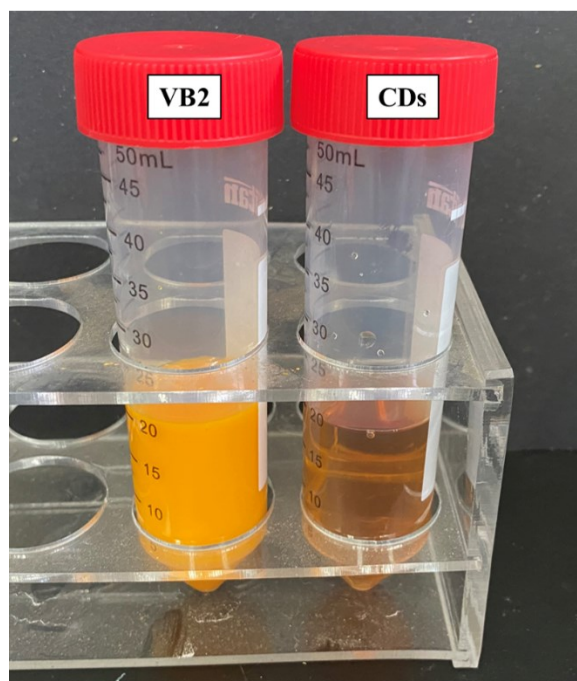

Fig. S1 Solubility comparison between VB2 and CDs; Left: before the reaction, 300 mg VB2 in 20 mL water.; Right: after the reaction, the prepared CDs in water.

## 2. FT-IR spectrum

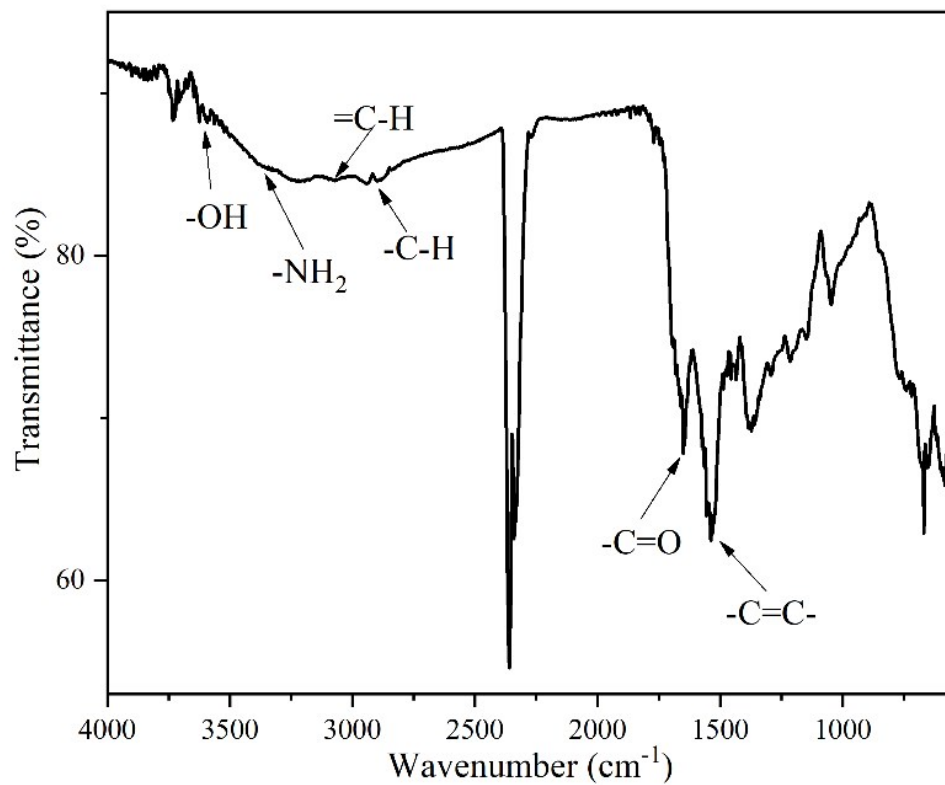

Fig. S2 FT-IR spectrum of carbon dots.

### 3. XPS spectra

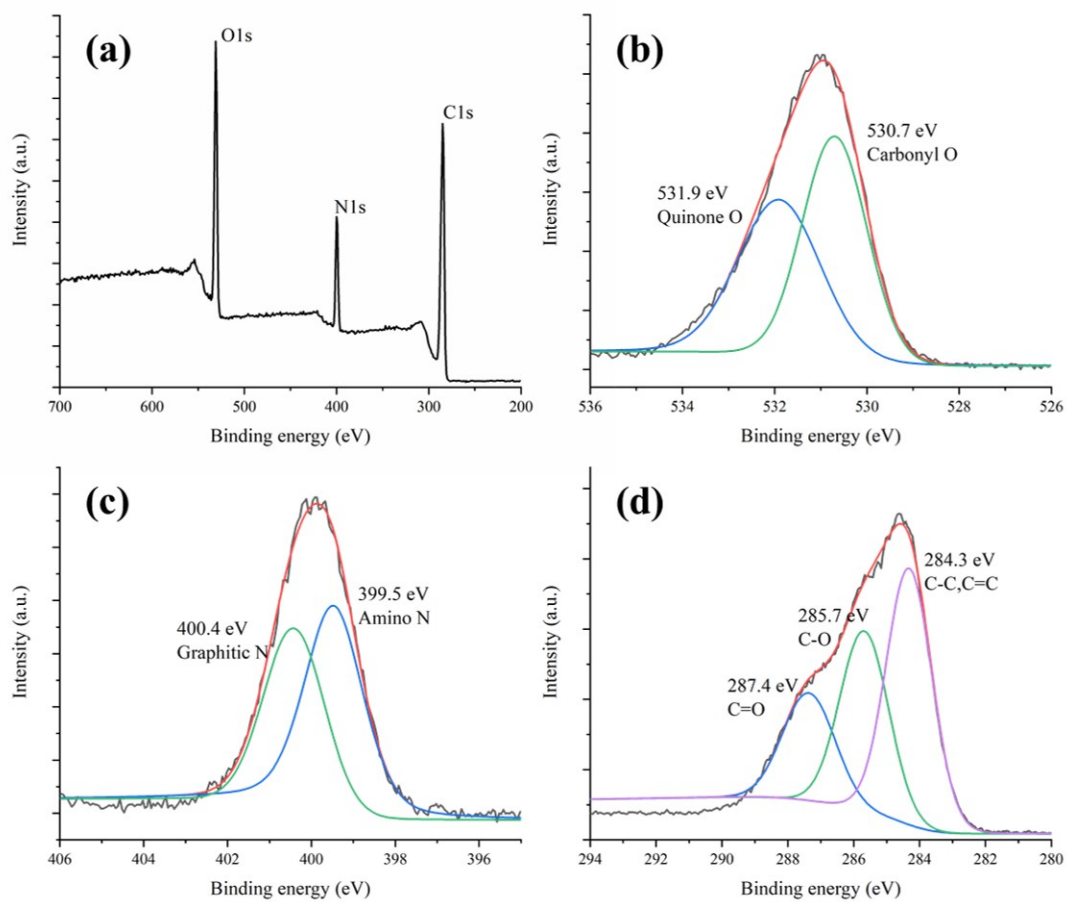

Fig. S3 XPS spectra of the CDs. Full-scan spectrum (a) and high-resolution spectrum of O 1s (b), N 1s (c), and C 1s (d).

#### 4. Stability of the CDs

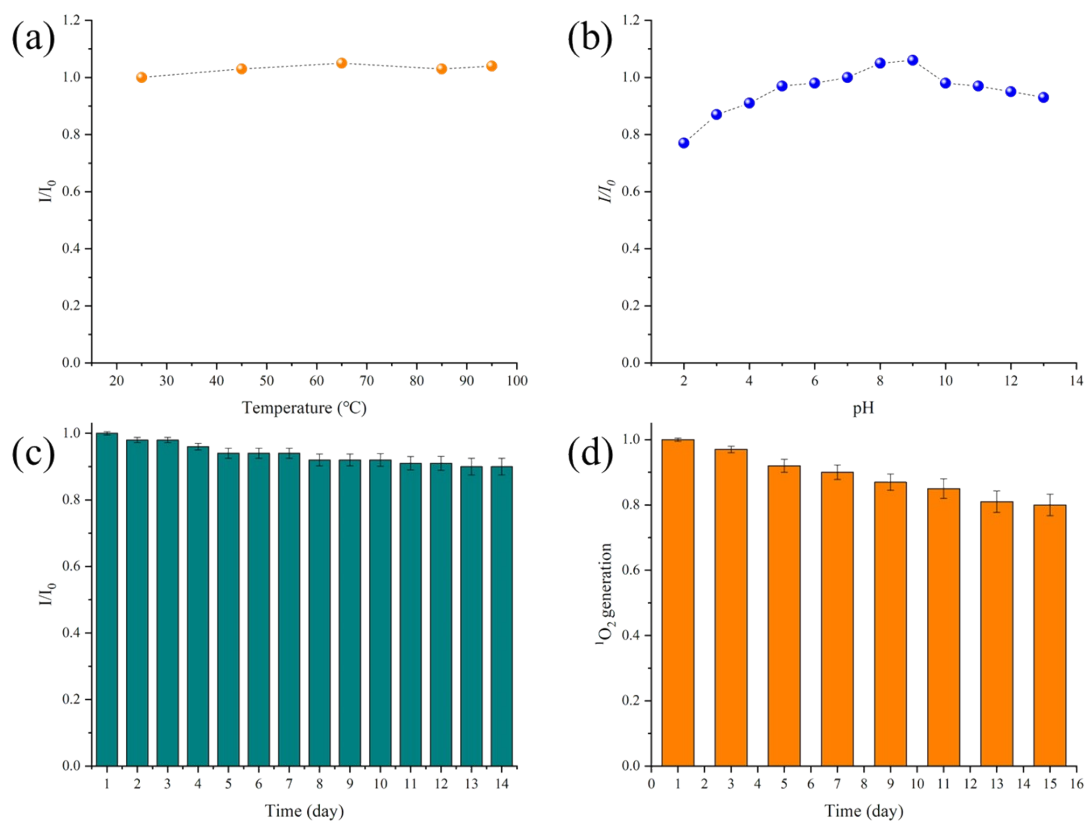

Fig. S4 (a) The integrated PL intensity of CDs at different temperatures; (b) Influence of the pH on the PL intensity of CDs; (c) The integrated PL intensity of CDs after different storage time; (d) Singlet oxygen generation ability of CDs with time (measured by SOSG).

## 5. Calculation of $^1\text{O}_2$ quantum yield

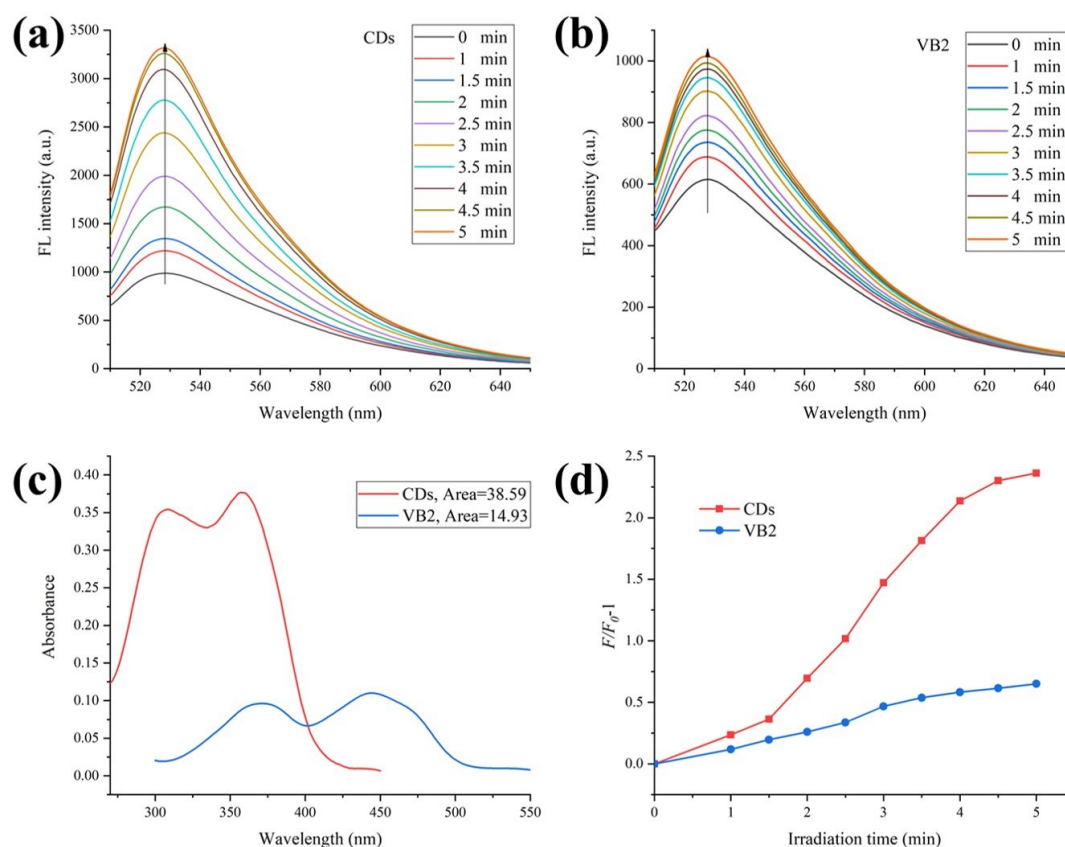

Fig. S5 (a) Fluorescence increase of SOSG with CDs at different irradiation times; (b) Fluorescence increase of SOSG with VB2 after different irradiation time; (c) The absorption peak area of CDs and VB2; (d) Rate of fluorescence increase of SOSG with CDs and VB2 after different irradiation times ( $F_0$  and  $F$  are the fluorescence intensity of SOSG with CDs or VB2 before and after irradiation, respectively).

### $^1\text{O}_2$ quantum yield calculation

To assess the ability of CDs to generate  $^1\text{O}_2$ , the  $^1\text{O}_2$  quantum yield was measured by a fluorescence enhancement method (SOSG as the trapping agent) with VB2 as the standard photosensitizer ( $^1\text{O}_2$  quantum yield  $\Phi_{VB2} = 0.51$ <sup>1,2</sup>).

The  $^1\text{O}_2$  quantum yield of the CDs was calculated using the equation below,

$$Q_c = Q_s \cdot \frac{I_c}{I_s} \cdot \frac{A_s}{A_c}$$

where 'Q' means the  $^1\text{O}_2$  quantum yield; 'I' represents the intensity of relative fluorescence enhancement ( $F/F_0-1$ ) and 'A' signifies the absorbance. The subscript 'C' and 'S' stand for the CDs and the reference VB2, respectively.

Here, after 5 minutes of irradiation,  $I_c/I_s = 3.632$ ,  $A_s/A_c = 0.387$ ,  $Q_s = 0.51$ , thus, the  $Q_c$  is calculated as 0.716.

## 6. Cytotoxicity measurements

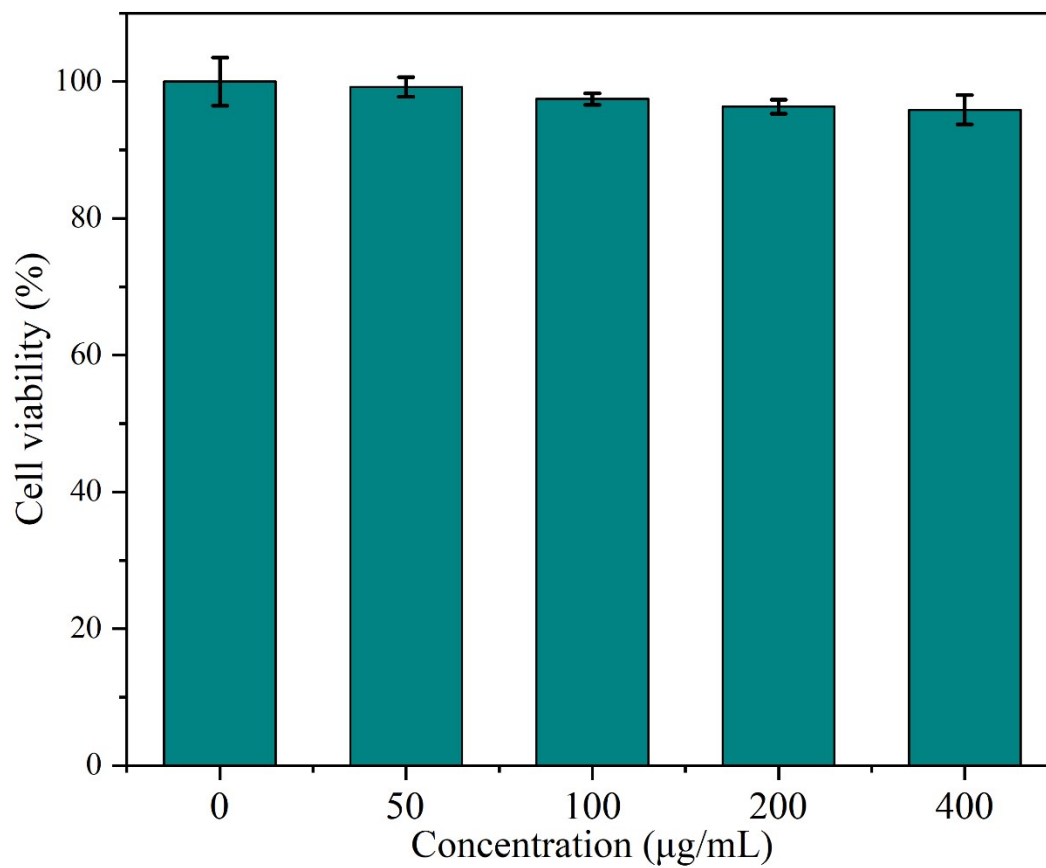

Fig. S6 CCK-8 assay results for the viability of 4T1 cells incubated with CDs (from 50 to 400 µg/mL).

## 7. PDT on cells

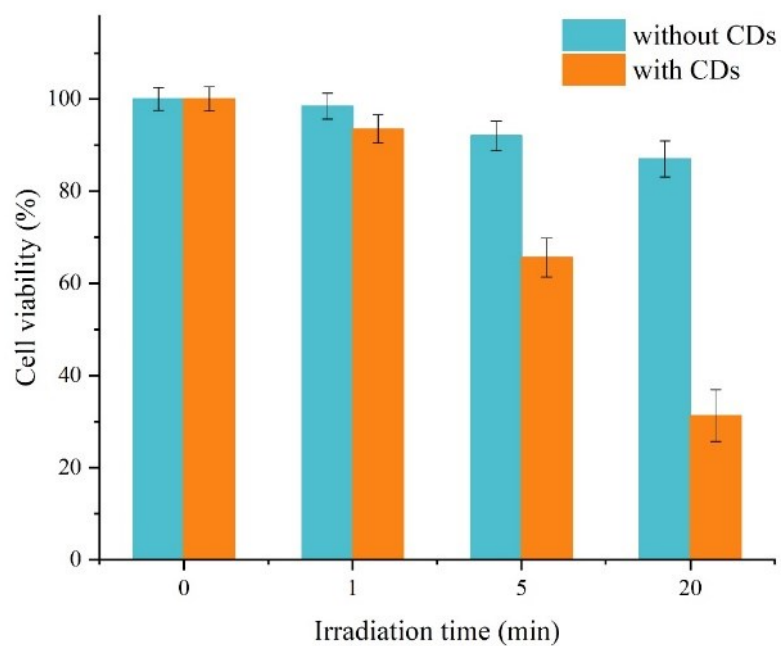

Fig. S7 Relative viabilities of 4T1 cells without and with CDs (100  $\mu\text{g}/\text{mL}$ ) under various irradiation times.



## References:

1. M. Insińska-Rak and M. Sikorski, *Chemistry – A European Journal*, 2014, **20**, 15280-15291.
2. E. Sikorska, I. Khmelinskii, A. Komasa, J. Koput, L. F. V. Ferreira, J. R. Herance, J. L. Bourdelande, S. L. Williams, D. R. Worrall, M. Insińska-Rak and M. Sikorski, *Chem. Phys.*, 2005, **314**, 239-247.
